# Supplementary material
Source: PubMed Central journal article supplement (PMC4536823)

## Pathologist

## Experience in lung pathology

Pathologist 1

> 20 years

Pathologist 2

> 5 years

Pathologist 3

> 5 years

Pathologist 4

4 years

Pathologist 5

2 years

**Determination of the reason for the discrepancy between frozen section diagnoses and permanent section diagnoses**

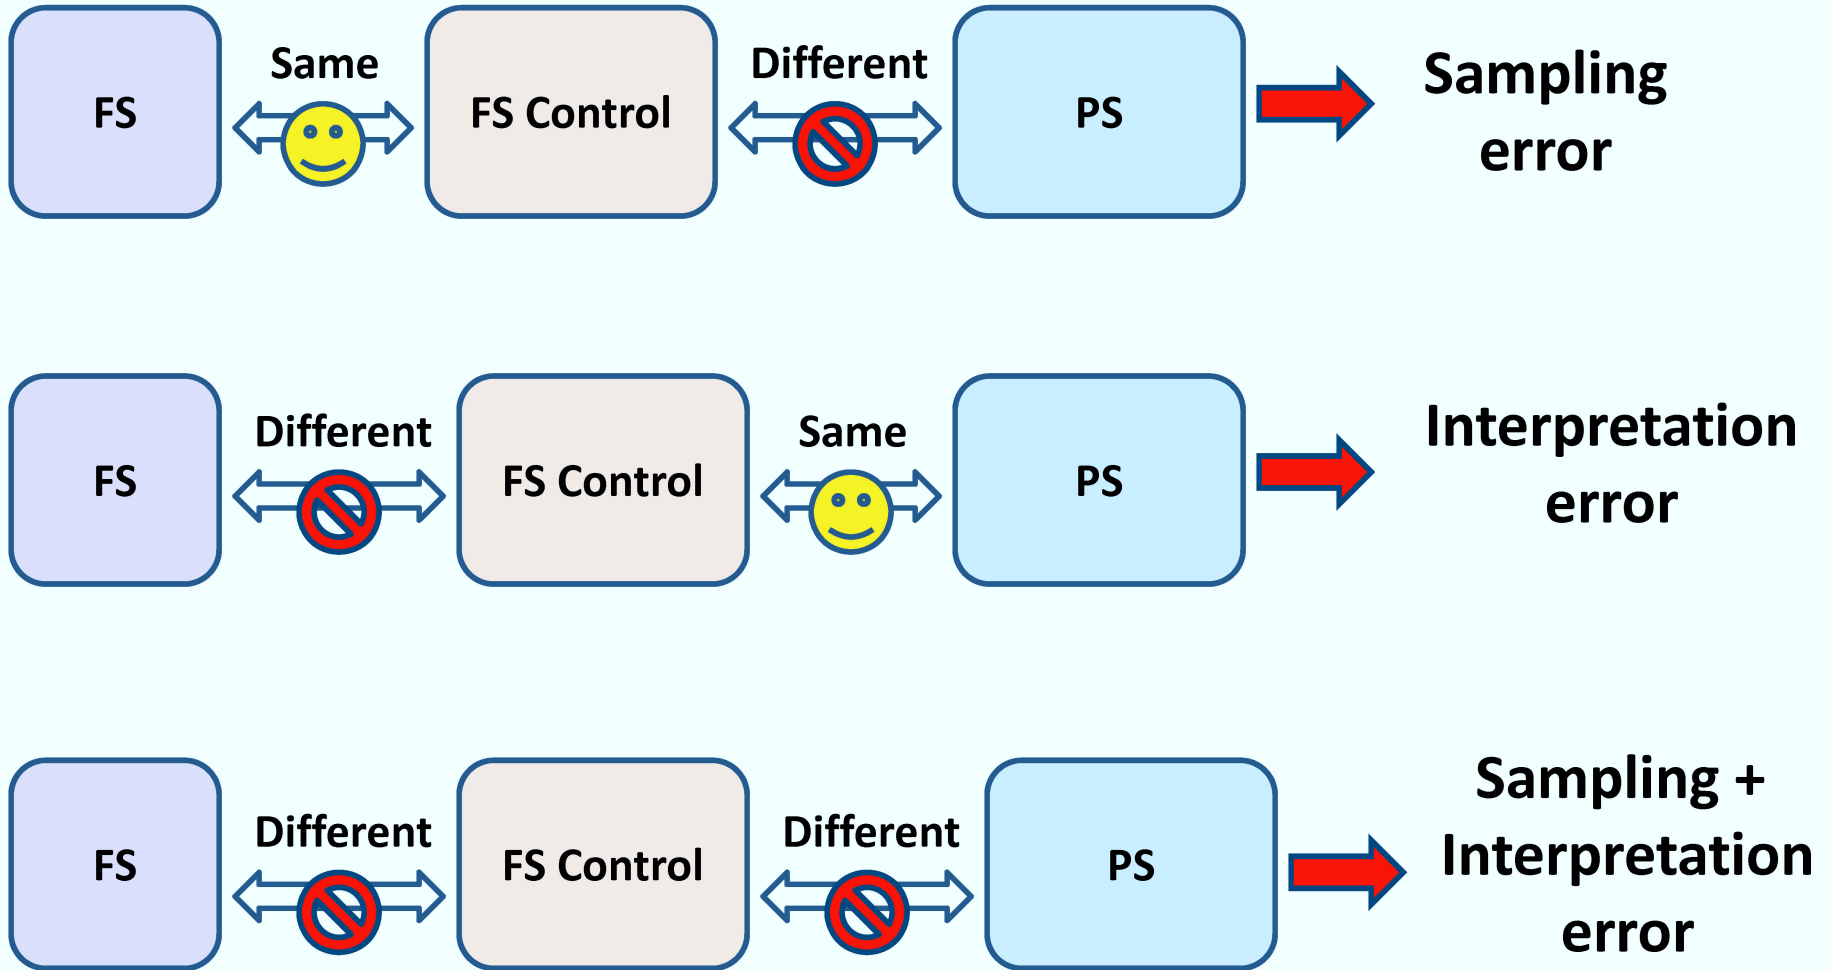

Supplement: NIHMS708609-supplement-Supp_TableS1-S2.pdf [file NIHMS708609-supplement-Supp_TableS1-S2.pdf]
